# Supplementary material for: Converting Carbon Dioxide to Butyrate with an Engineered Strain of Clostridium ljungdahlii
Source: PubMed Central journal article supplement — mBio. 2014 Oct 21;5(5):e01636-14. doi: 10.1128/mBio.01636-14 (PMC4212834; doi:10.1128/mbio.01636-14), 2014-10-21
Supplement: mbo005142037sf1.pdf [file mbo005142037sf1.pdf]

**A**

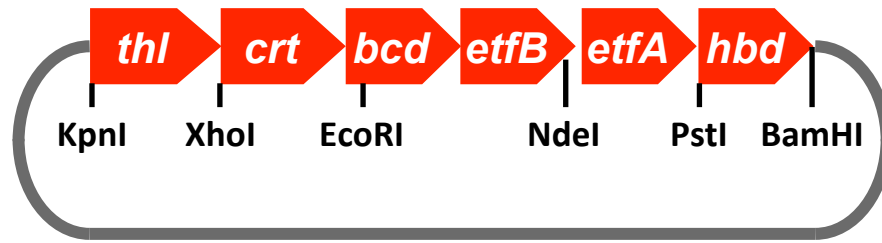

**B**

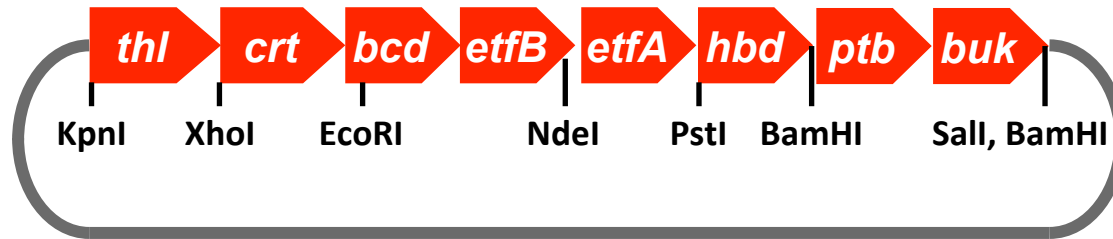

**Figure S1. Plasmids used for the butyrate pathway genes.**

(A) Assembly of *thl*, *crt*, *bcd*, *etfB*, *etfA*, and *hbd*.

(B) Assembly of *thl*, *crt*, *bcd*, *etfB*, *etfA*, *hbd*, *ptb*, and *buk*.
