# Supplementary material for: Converting Carbon Dioxide to Butyrate with an Engineered Strain of Clostridium ljungdahlii
Source: PubMed Central journal article supplement — mBio. 2014 Oct 21;5(5):e01636-14. doi: 10.1128/mBio.01636-14 (PMC4212834; doi:10.1128/mbio.01636-14), 2014-10-21
Supplement: mbo005142037sf2.pdf [file mbo005142037sf2.pdf]

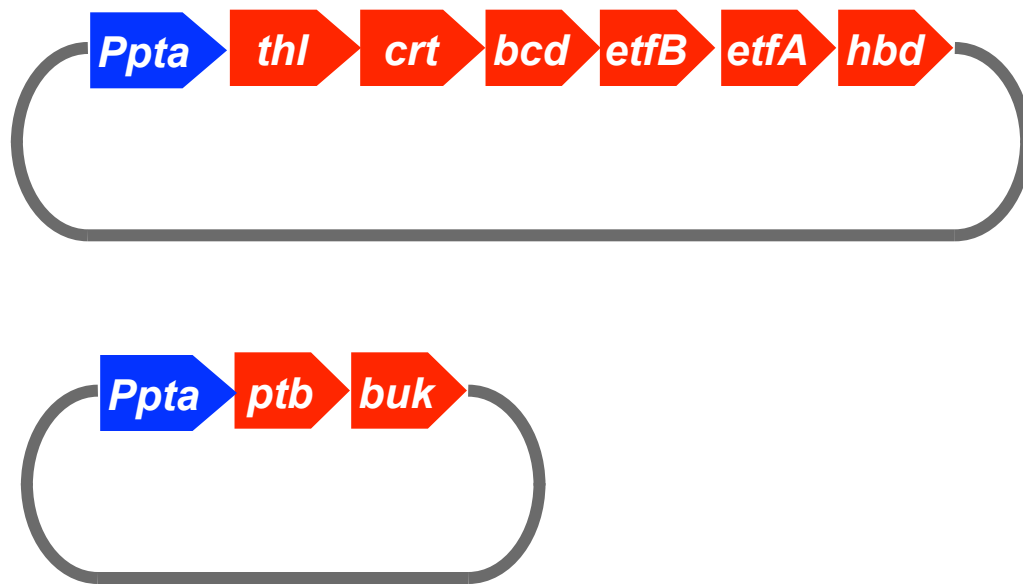

**Figure S2. Plasmid vectors used for expression of the butyrate pathway genes in *C. ljungdahlii* to create strains B1 and B2.**
