# Supplementary material for: Converting Carbon Dioxide to Butyrate with an Engineered Strain of Clostridium ljungdahlii
Source: PubMed Central journal article supplement — mBio. 2014 Oct 21;5(5):e01636-14. doi: 10.1128/mBio.01636-14 (PMC4212834; doi:10.1128/mbio.01636-14), 2014-10-21
Supplement: mbo005142037sf3.pdf [file mbo005142037sf3.pdf]

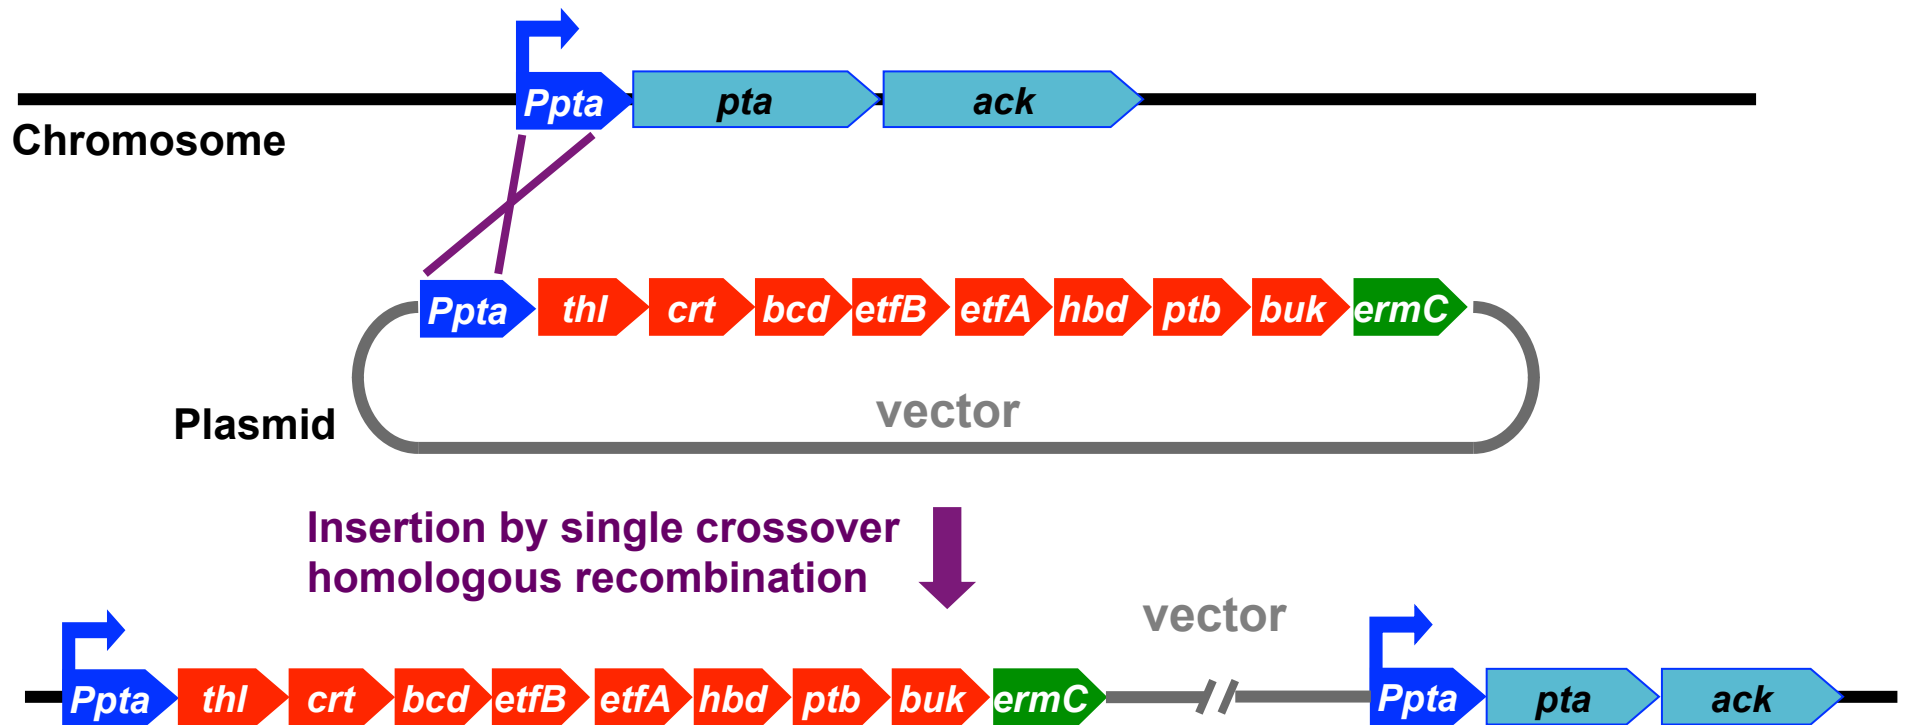

**Figure S3. Construction of Strain B3.**

The butyrate pathway genes were integrated at the *pta* promoter region on the chromosome DNA.
