# Supplementary material for: Converting Carbon Dioxide to Butyrate with an Engineered Strain of Clostridium ljungdahlii
Source: PubMed Central journal article supplement — mBio. 2014 Oct 21;5(5):e01636-14. doi: 10.1128/mBio.01636-14 (PMC4212834; doi:10.1128/mbio.01636-14), 2014-10-21
Supplement: mbo005142037sf4.pdf [file mbo005142037sf4.pdf]

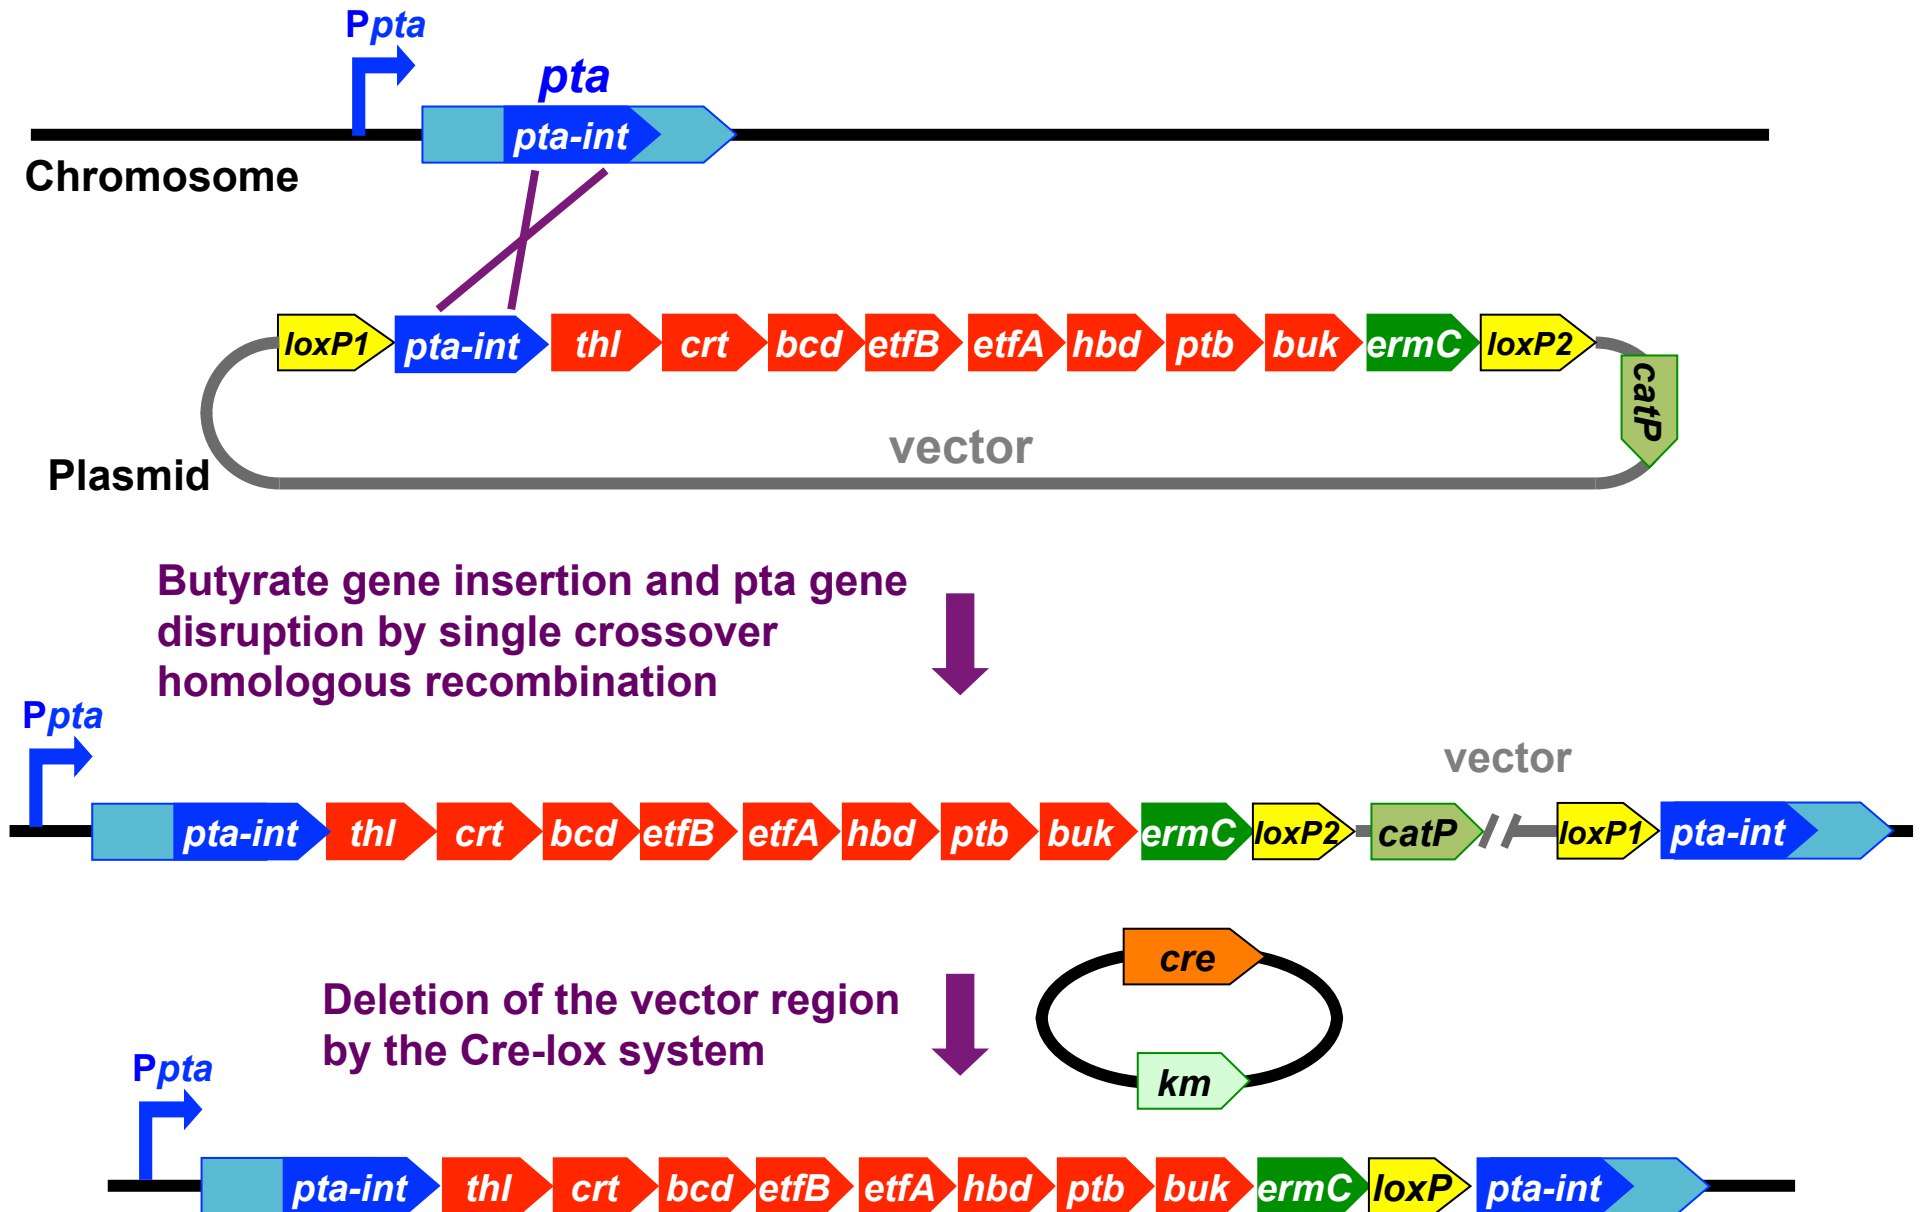

**Figure S4. Construction of Strain B4.**

The *pta* gene was disrupted by inserting the butyrate pathway genes at the internal region of the *pta* gene on the chromosome. The *pta* gene was truncated into two incomplete segments.
