# Supplementary material for: Converting Carbon Dioxide to Butyrate with an Engineered Strain of Clostridium ljungdahlii
Source: PubMed Central journal article supplement — mBio. 2014 Oct 21;5(5):e01636-14. doi: 10.1128/mBio.01636-14 (PMC4212834; doi:10.1128/mbio.01636-14), 2014-10-21
Supplement: mbo005142037sf5.pdf [file mbo005142037sf5.pdf]

AGGAGGTTAGTTAGA

**ATG**TCAAATCTTCTTACAGTTCATCAAAATCTTCCTGCTTTACCAGTTGATGCTACAAGTGATGAAGTTAGAAAA  
AATCTTATGGATATGTTTAGAGATAGACAAGCATTTCAGAACATACATGGAAAATGCTTCTTAGTGTTTGTAGA  
TCATGGGCAGCTTGGTGTAAACTTAATAATAGAAAATGGTTTCCTGCTGAACCAGAAGATGTTAGAGATTATCTT  
CTTTATCTTCAAGCAAGAGGACTTGCTGTAAAACTATTCACAACATCTTGGACAACCTAATATGTTACATAGA  
AGAAGTGGTCTTCCTAGACCAAGTGATTCAAATGCAGTTTCATTAGTAATGAGAAGAATAAGAAAAGAAAATGTT  
GATGCAGGAGAAAGAGCTAAACAAGCACTTGCTTTTGAAAGAACAGATTTTGATCAAGTTAGATCTTTAATGGAA  
AATAGTGATAGATGTCAAGATATAAGAAATCTTGCATTTTTAGGTATTGCTTATAATACACTTCTTAGAATAGCA  
GAAATAGCTAGAATAAGAGTAAAAGATATAAGTAGAACTGATGGAGGTAGAATGCTTATTCATATAGGAAGAACA  
AAAACCTCTGTTTCAACAGCAGGAGTAGAAAAAGCATTAAAGTTTAGGTGTTACTAAACTTGTAGAAAGATGGATA  
TCTGTTAGTGGAGTAGCAGATGATCCTAATAATTATTTATTTTGTAGAGTTAGAAAAAATGGTGTAGCAGCTCCA  
TCAGCTACATCTCAACTTAGTACTAGAGCATTAGAAGGAATATTTGAAGCTACACATAGACTTATATATGGAGCA  
AAAGATGATTCTGGTCAAAGATATTTAGCATGGTCAGGACATTCTGCTAGAGTTGGTGCAGCTAGAGATATGGCA  
AGAGCTGGAGTAAGTATTCCTGAAATAATGCAAGCTGGAGGTTGGACTAATGTTAATATAGTAATGAATTATATT  
AGAAATTTAGATAGTGAAACTGGAGCAATGGTTAGACTTTTAGAAGATGGTGAT**TAA**

**Figure S5. Sequence of the synthesized *cre* gene.**

Ribosome binding site is underlined. Translation initiation codon (ATG) and stop codon (TAA) are indicated in bold.
