# Supplementary material for: Converting Carbon Dioxide to Butyrate with an Engineered Strain of Clostridium ljungdahlii
Source: PubMed Central journal article supplement — mBio. 2014 Oct 21;5(5):e01636-14. doi: 10.1128/mBio.01636-14 (PMC4212834; doi:10.1128/mbio.01636-14), 2014-10-21
Supplement: mbo005142037sf6.pdf [file mbo005142037sf6.pdf]

GGCCGGCCGAAGCAAACCTTAAGAGTGTGTTGATAGTGCAGTATCTTAAAATTTTGTATAATAGGAATTGAAGTTA  
AATTAGATGCTAAAAATTTGTAATTTCTAGAAGGAGGTTAGTTAGA  
**ATG**ATAGAACAAGATGGATTACATGCTGGTAGTCCTGCTGCTTGGGTAGAAAGATTATTTGGTTATGATTGGGCA  
CAACAAACAATTGGATGTTCTGATGCAGCTGTTTTTAGATTAAGTGCACAAGGAAGACCTGTTCTTTTTGTAAAA  
ACAGATTTATCAGGTGCTCTTAATGAATTACAAGATGAAGCAGCTAGACTTTCTTGGTTAGCAACAACCTGGAGTT  
CCATGTGCAGCTGTACTTGATGTTGTAACCTGAAGCTGGAAGAGATTGGTTACTTTTAGGAGAAGTTCCTGGTCAA  
GATCTTTTAAGTTCACATTTAGCACCAGCTGAAAAAGTTAGTATAATGGCAGATGCTATGAGAAGACTTCATACA  
TTAGATCCTGCAACTTGTCCATTTGATCATCAAGCTAAACATAGAATAGAAAGAGCAAGAACAAGAATGGAAGCT  
GGACTTGTTGATCAAGATGATTTAGATGAAGAACATCAAGGTTTAGCACCTGCTGAACTTTTTGCAAGACTTAAA  
GCTAGAATGCCAGATGGAGAAGATCTTGTGTAACACATGGTGATGCTTGTTTACCTAATATTATGGTTGAAAAT  
GGAAGATTTTCAGGTTTTATTGATTGTGGAAGATTAGGTGTAGCAGATAGATATCAAGATATAGCACTTGCTACT  
AGAGATATTGCAGAAGAATTAGGTGGTGAATGGGCTGATAGATTTCTTGTATTATATGGAATAGCAGCACCAGAT  
AGTCAAAGAATAGCATTTTATAGATTATTAGATGAATTTTTTT**TAA**

**Figure S6. Sequence of the synthesized *PermB-kan* gene.**

Ribosome binding site is underlined. Translation initiation codon (ATG) and stop codon (TAA) are indicated in bold.
