# Supplementary material for: Converting Carbon Dioxide to Butyrate with an Engineered Strain of Clostridium ljungdahlii
Source: PubMed Central journal article supplement — mBio. 2014 Oct 21;5(5):e01636-14. doi: 10.1128/mBio.01636-14 (PMC4212834; doi:10.1128/mbio.01636-14), 2014-10-21
Supplement: mbo005142037sf7.pdf [file mbo005142037sf7.pdf]

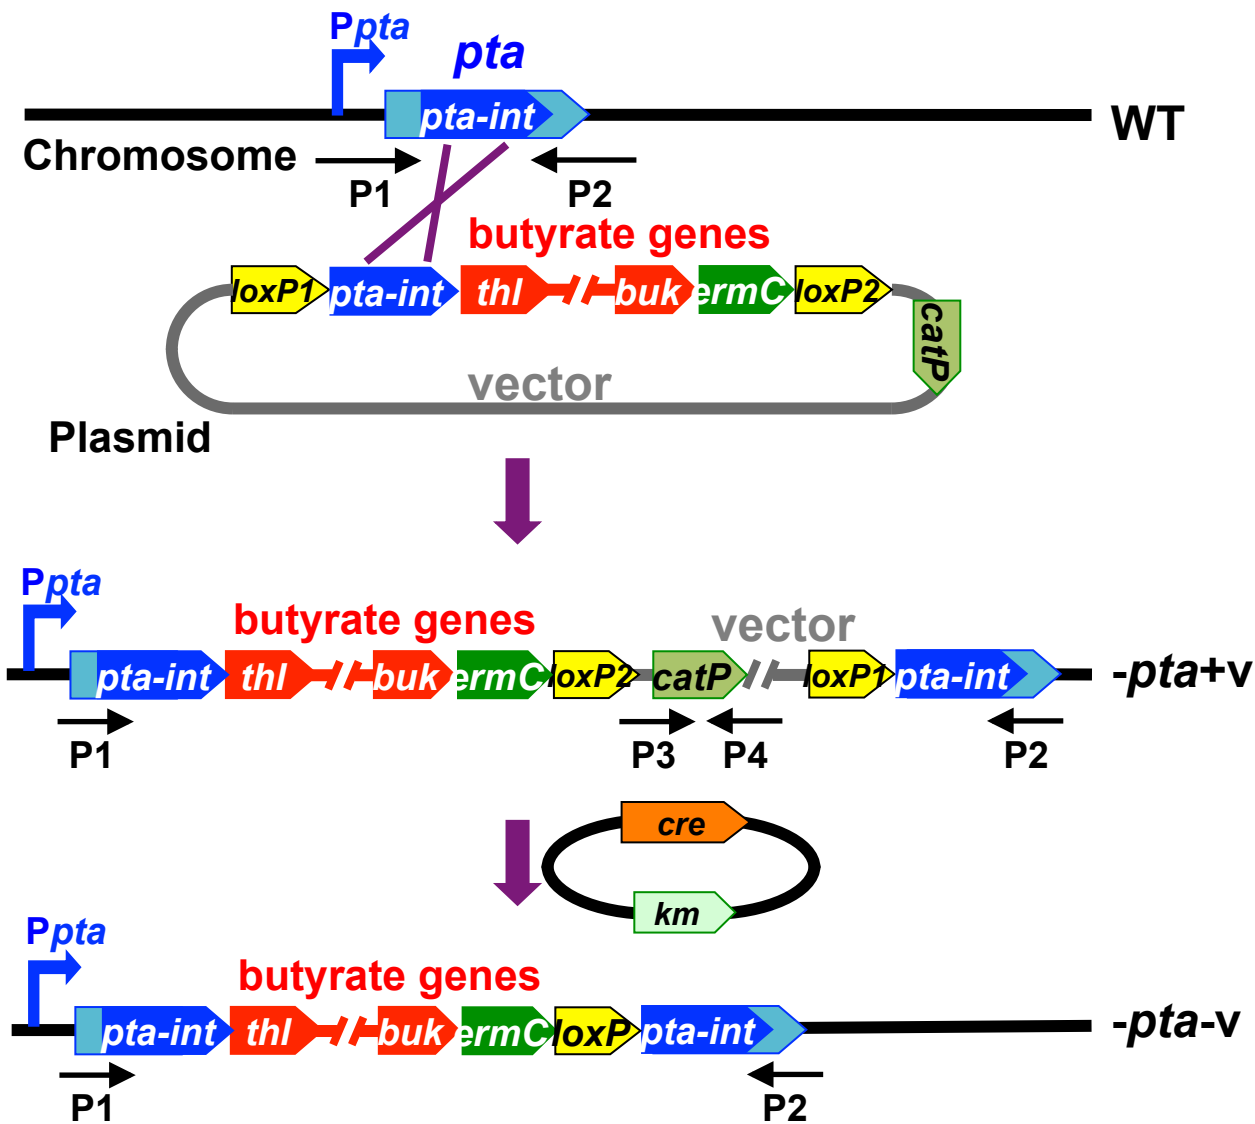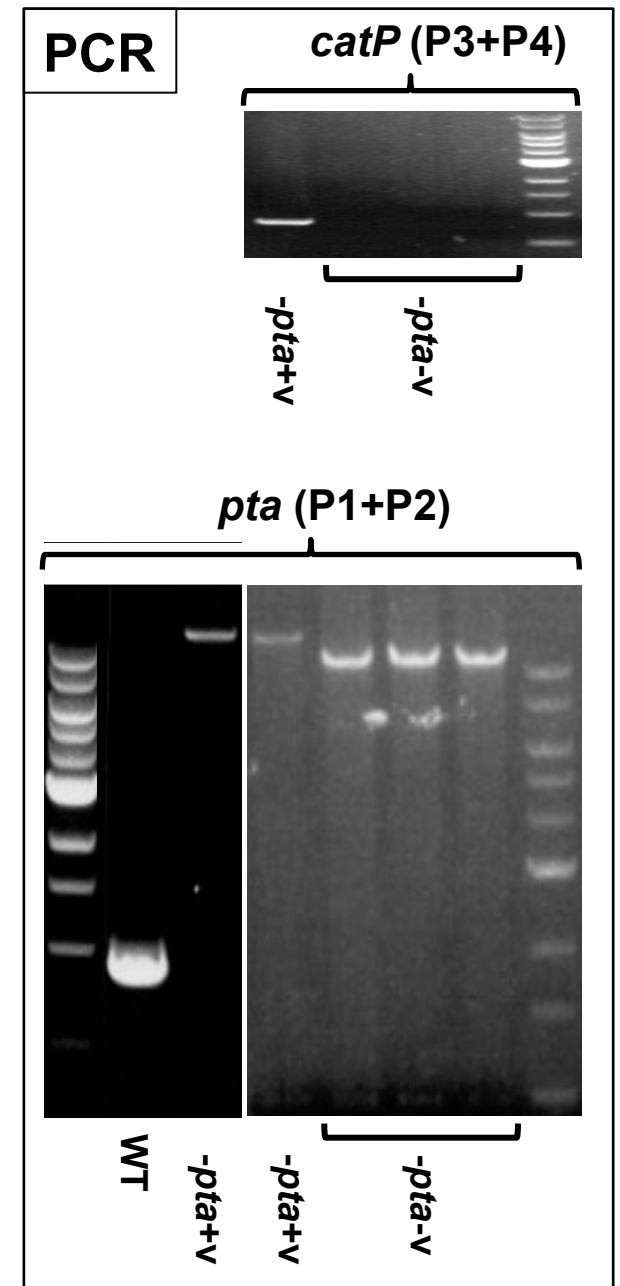

**Figure S7. Deletion of the vector from the chromosome DNA by the Cre-lox system.** Disruption of the *pta* gene and absence of the vector region were verified by PCR. Primers specific to the *pta* gene or the *catP* gene were used for PCR analysis. Three independent colonies after the Cre-lox recombination (-*pta*-v) were analyzed.
