# Supplementary material for: Converting Carbon Dioxide to Butyrate with an Engineered Strain of Clostridium ljungdahlii
Source: PubMed Central journal article supplement — mBio. 2014 Oct 21;5(5):e01636-14. doi: 10.1128/mBio.01636-14 (PMC4212834; doi:10.1128/mbio.01636-14), 2014-10-21
Supplement: mbo005142037sf8.pdf [file mbo005142037sf8.pdf]

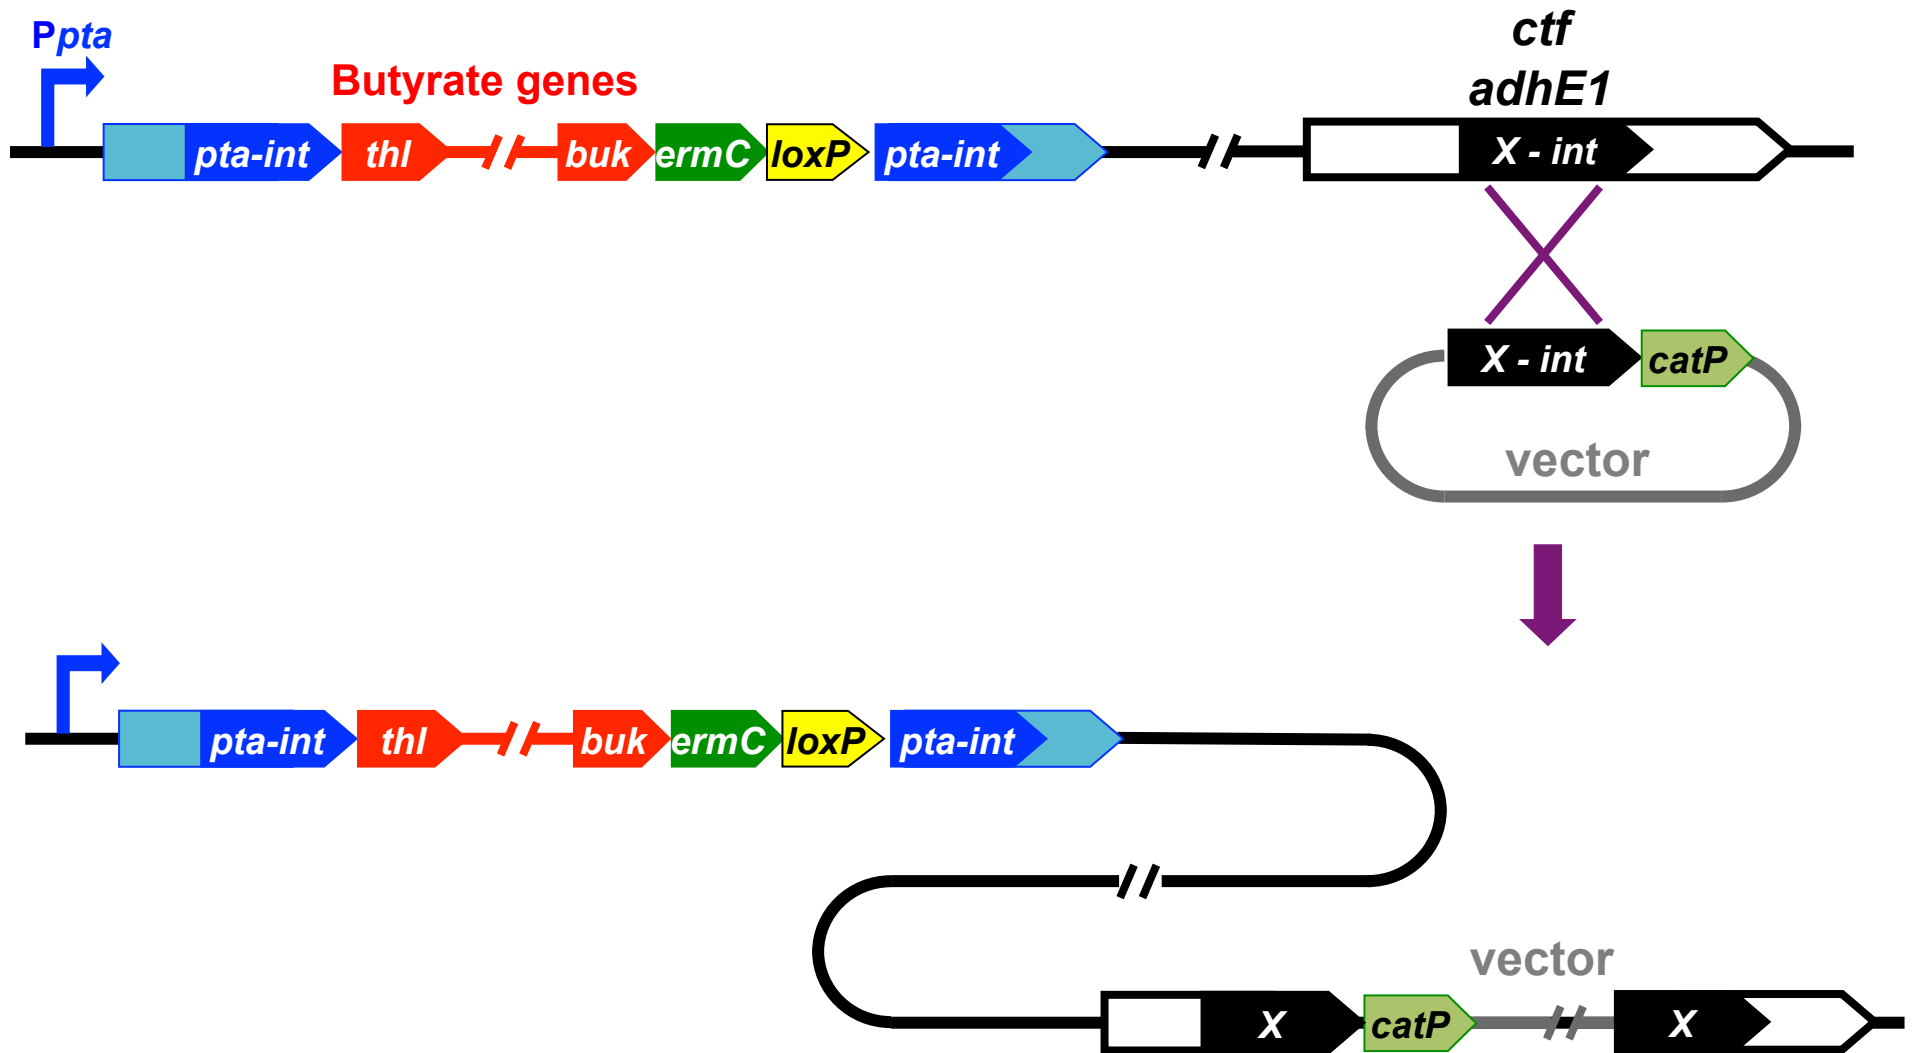

**Figure S8. Construction of Strain B5 and B6.**

The *adhE1* or *ctf* genes were disrupted in Strain B4. The *adhE1* or *ctf* genes were truncated into two incomplete segments. The *adhE1* or *ctf* genes were presented as X.
