# Supplementary material for: Converting Carbon Dioxide to Butyrate with an Engineered Strain of Clostridium ljungdahlii
Source: PubMed Central journal article supplement — mBio. 2014 Oct 21;5(5):e01636-14. doi: 10.1128/mBio.01636-14 (PMC4212834; doi:10.1128/mbio.01636-14), 2014-10-21
Supplement: mbo005142037st1.pdf [file mbo005142037st1.pdf]

Table S1. Primers used in this study.

| Name                   | Sequence                                                 | Enzyme  |
|------------------------|----------------------------------------------------------|---------|
| pta promoter (Ppta)    |                                                          |         |
| Ppta-P1                | GAATTCATTTGTCAACTATAGATG                                 | EcoRI   |
| Ppta-P2                | GGTACCTTTAAATTTAACACAAAATTACACACAC                       | KpnI    |
| Butyrate pathway genes |                                                          |         |
| thl-P1                 | GGTACCAGGAGGTTAGTTAGAATGAAAGAAG                          | KpnI    |
| thl-P2                 | CTCGAGCTAGCACTTTTCTAGCAATATTGC                           | XhoI    |
| crt-P1                 | CTCGAGTTTAGGAGGATTAGTCATGGAECTAAAC                       | XhoI    |
| crt-P2                 | TCCACCTGCGCCACCATACTC                                    |         |
| crt-P3                 | CTCGAGAGGAGGATTAGTCATGGAECTAAAC                          | XhoI    |
| bcd-etfB-P1            | ATGGGTCAGTATGGTATGATG                                    |         |
| bcd-etfB-P2            | TCCCTCCTAACTTAAATATAGTG                                  |         |
| etfA-P1                | AGCCTGTTAAGGAAGCAGCTGC                                   |         |
| etfA-P2                | CTGCAGTTAATTATTAGCAGCTTTAACTTGAGC                        | PstI    |
| hbd-P1                 | CTGCAGGGAGGTCTGTTTAATGAAAAAGGTATG                        | PstI    |
| hbd-P2                 | GGATCCTTATTTTGAATAATCGTAGAAACC                           | BamHI   |
| ptb-P1                 | GGATCCGAGCACGTTAATCATTTAACATAG                           | BamHI   |
| buk-P1                 | GTCGACTTTATTATTTGTATTCCTTAGC                             | Sall    |
| loxP cassette          |                                                          |         |
| loxP1-T                | AATTATAACTTCGTATAGCATAACATTATACGAAGTTATCTCGAGTCAGACTAGTG |         |
| loxP1-B                | AATTCAGTAGTCTGACTCGAGATAACTTCGTATAATGTATGCTATACGAAGTTAT  |         |
| loxP2-T                | AGCTTATAACTTCGTATAGCATAACATTATACGAAGTTATCCGCGGTCAGAGATCT |         |
| loxP2-B                | AGCTAGATCTCTGACCGCGGATAACTTCGTATAATGTATGCTATACGAAGTTATA  |         |
| catP-P1                | ACCAGATCTTTTTTCGGCAAGTGTTCAAG                            | BglII   |
| catP-P2                | TCTCCGCGGAACACAAGGTCTTTGTTACTAAC                         | SacII   |
| ermC-P1                | TCTGCATGCTAGATAAATCTCTCATATC                             | SphI    |
| ermC-P2                | TCTAAGCTTCGCTCATATTTATATAG                               | HindIII |
| PermB-kan              |                                                          |         |

|              |                               |      |
|--------------|-------------------------------|------|
| PermB-P1     | ATCGATGAAGCAAACCTTAAGAGTGTG   | ClaI |
| Km-P1        | GTAACTTAAAAAATTCATCTAATAATC   | HpaI |
| pta-int      |                               |      |
| pta-int-P1   | ACTAGTTCAGATAAACTAAAGGCATATGC | SpeI |
| pta-int-P2   | GGTACCAGGAGCCTTTAAACTTGC      | KpnI |
| adhE1-int    |                               |      |
| adhE1-int-P1 | ACTAGTTCATCCCAAGGTGGTATAG     | SpeI |
| adhE1-int-P2 | GGTACCCTGTTCTGCGGATGTTGC      | KpnI |
| ctf-int      |                               |      |
| 39430-P1     | ACTAGTATGGATTATGATACCTTG      | SpeI |
| 39430-P2-    | GGTACCTATTAATCTTGGAATAGCC     | KpnI |
| qRT-PCR      |                               |      |
| recA-F       | TGTGGATGCCATTTCAACAG          |      |
| recA-R       | TATGAAGTGCCACCGTAGTC          |      |
| pta-F        | CCTGTATGCCAAGGATTTGC          |      |
| pta-R        | TGAGCTTGTGCTTGAAGTGC          |      |
| thl-F        | AATCCAGCAAGACAGGCATC          |      |
| thl-R        | ATTACGTCAGCATCTCCTGC          |      |
| crt-F        | ATAGCTTCAAGCAACGCAAG          |      |
| crt-R        | CATGCCCATTCCAATAATC           |      |
| bcd-F        | AATTCCAAGGTCTTGCATGG          |      |
| bcd-R        | AGCTCTTGCAGCATCAACTG          |      |
| etfA-F       | ACAATAGCCGCTTCAAGAGC          |      |
| etfA-R       | GCATACCTGCTAAATGCTGG          |      |
| etfB-F       | GTGGACTGCCGATGATATAG          |      |
| etfB-R       | GCAGCTGCTTCCTTAACAGG          |      |
| hbd-F        | GGTTCAGGAATTGCTCAGGC          |      |
| hbd-R        | CTAAATCGCAATCAGCTGCC          |      |
| ptb-F        | TGCTCCAATTTGTGCAGTTG          |      |

|       |                       |
|-------|-----------------------|
| ptb-R | TCAAGTGCTAAAGGTCCGTC  |
| buk-F | GTTCAAGGTCAGCATGCGTC  |
| buk-R | CAAGTCATCCACAACAACCTG |

---
